# Supplementary material for: Behavioural Characterisation of Macrod1 and Macrod2 Knockout Mice
Source: PubMed Central journal article supplement (PMC7916507; doi:10.3390/cells10020368), 2021-02-10
Supplement: cells-10-00368-s001.pdf [file cells-10-00368-s001.pdf]

## Supplemental information

**Table S1:** Descriptive statistics of data from *Macro2* accelerated rotarod. Mean  $\pm$  SEM is presented. Individual N number is included as well as p-values for all terms and interactions. *Macro2* used a factorial-ANOVA with repeated measures, hence the term Mouse name. x = not an exact F-test.

| <i>Macro2</i><br>Rotarod | Latency to fall (s) |                                      |                           |
|--------------------------|---------------------|--------------------------------------|---------------------------|
|                          | AGE                 | WT                                   | <i>Macro2</i> KO          |
| Female                   | 3 months            | 196.3 $\pm$ 13.2<br>N=20             | 201.1 $\pm$ 11.3<br>N=17  |
| Male                     |                     | 191.0 $\pm$ 12.9<br>N=14             | 155.70 $\pm$ 9.74<br>N=20 |
| Female                   | 13 months           | 207.6 $\pm$ 12.7<br>N=16             | 193.0 $\pm$ 12.5<br>N=16  |
| Male                     |                     | 170.3 $\pm$ 15.5<br>N=13             | 186.9 $\pm$ 18.3<br>N=17  |
| Genotype                 |                     | F <sub>(1,56)</sub> =0.97, p=0.327 x |                           |
| Sex                      |                     | F <sub>(1,56)</sub> =1.14, p=0.290 x |                           |
| Genotype*Sex             |                     | F <sub>(1,56)</sub> =1.13, p=0.291 x |                           |
| Cohort                   |                     | F <sub>(1,56)</sub> =0.29, p=0.594   |                           |
| Weight                   |                     | F <sub>(1,56)</sub> =18.49, p=0.006  |                           |
| Weight*Sex               |                     | F <sub>(1,56)</sub> =0.28, p=0.597   |                           |
| Weight*Cohort            |                     | F <sub>(1,56)</sub> =0.18, p=0.675   |                           |
| Sex*Cohort               |                     | F <sub>(1,56)</sub> =0.34, p=0.562   |                           |
| Genotype*Cohort          |                     | F <sub>(1,56)</sub> =1.11, p=0.296   |                           |
| Mouse name               |                     | F <sub>(1,56)</sub> =2.05, *p=0.003  |                           |

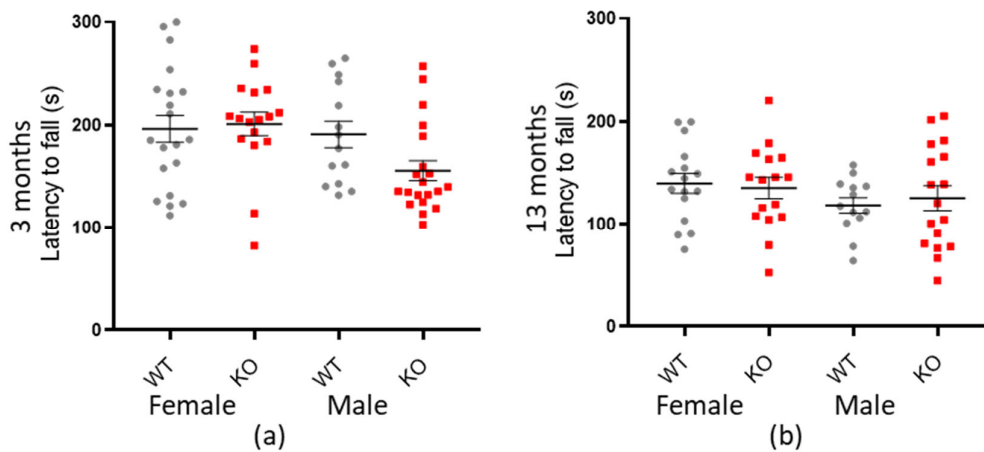

**Figure S1:** *Macro2* KO is not associated with reduced fall latency on the rotarod. Graphs show individual values dot plot, WT shown in grey circles and *Macro2* KO in red squares. Error bars are the SEM. Graphs are as follows a-b) *Macro2* 3 and 13 months.

**Table S2:** Descriptive statistics of central proportion from *Macro2* open field. Mean  $\pm$  SEM is presented. Individual N number is included as well as p-values for all terms and interactions. *Macro2* used a factorial-ANOVA with repeated measures, hence the term Mouse name. x = not an exact F-test.

| <i>Macro2</i><br>Open Field | Central % |                                      |                          |
|-----------------------------|-----------|--------------------------------------|--------------------------|
|                             | AGE       | WT                                   | <i>Macro2</i> KO         |
| Female                      | 3 months  | 35.41 $\pm$ 1.59<br>N=19             | 39.35 $\pm$ 2.28<br>N=17 |
| Male                        |           | 39.61 $\pm$ 1.36<br>N=14             | 43.40 $\pm$ 1.80<br>N=20 |
| Female                      | 13 months | 35.47 $\pm$ 1.55<br>N=16             | 37.71 $\pm$ 1.81<br>N=16 |
| Male                        |           | 40.11 $\pm$ 1.19<br>N=13             | 39.73 $\pm$ 1.74<br>N=17 |
| Genotype                    |           | F <sub>(1,55)</sub> =2.79, p=0.099 x |                          |
| Sex                         |           | F <sub>(1,55)</sub> =0.23, p=0.635 x |                          |
| Genotype*Sex                |           | F <sub>(1,55)</sub> =0.11, p=0.737 x |                          |
| Cohort                      |           | F <sub>(1,55)</sub> =0.46, p=0.501   |                          |
| Weight                      |           | F <sub>(1,55)</sub> =0.36, p=0.554   |                          |
| Weight*Sex                  |           | F <sub>(1,55)</sub> =0.38, p=0.538   |                          |
| Weight*Cohort               |           | F <sub>(1,55)</sub> =0.60, p=0.441   |                          |
| Sex*Cohort                  |           | F <sub>(1,55)</sub> =0.01, p=0.917   |                          |
| Genotype*Cohort             |           | F <sub>(1,55)</sub> =1.73, p=0.194   |                          |
| Mouse name                  |           | F <sub>(1,55)</sub> =1.68, *p=0.024  |                          |

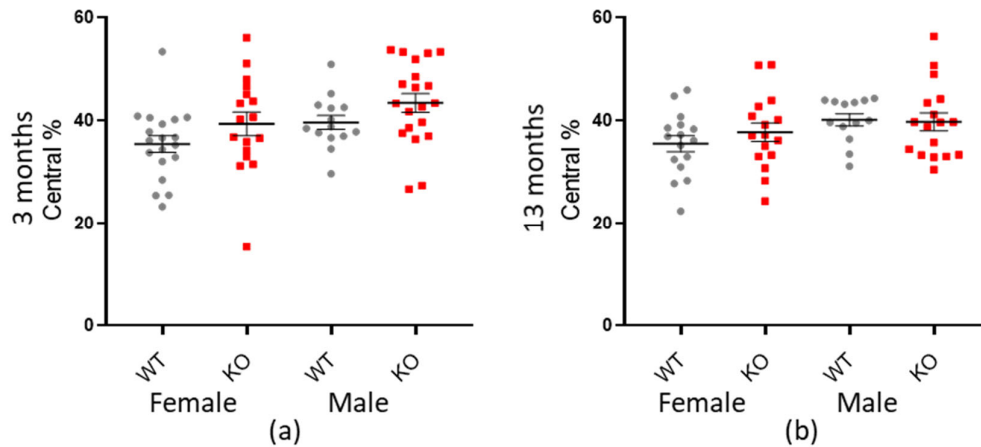

**Figure S2:** *Macro2* KO is not associated with anxiety in LMA Open Field. Graphs show individual values dot plot, WT shown in grey circles and *Macro2* KO in red squares. Error bars are the SEM. Graphs are as follows a-b) *Macro2* 3 and 13 months.

**Table S3:** Descriptive statistics of data from *MacroD1* LMA Open Field. Mean  $\pm$  SEM is presented. Individual N number is included as well as p-values for all terms and interactions. *MacroD1* used a factorial-ANOVA.

| <i>MacroD1</i><br><i>Open Field</i> | <i>Total distance (beam breaks)</i> |                                     |                        | <i>Central %</i>                    |                          |
|-------------------------------------|-------------------------------------|-------------------------------------|------------------------|-------------------------------------|--------------------------|
|                                     | AGE                                 | WT                                  | <i>MacroD1</i> KO      | WT                                  | <i>MacroD1</i> KO        |
| Female                              | 12 months                           | 4704 $\pm$ 321<br>N=13              | 4889 $\pm$ 301<br>N=17 | 38.32 $\pm$ 1.14<br>N=13            | 39.51 $\pm$ 1.72<br>N=17 |
| Male                                |                                     | 4530 $\pm$ 374<br>N=12              | 5161 $\pm$ 483<br>N=12 | 36.46 $\pm$ 1.49<br>N=12            | 37.74 $\pm$ 1.57<br>N=12 |
| Female                              | 18 months                           | 5660 $\pm$ 251<br>N=17              | 5111 $\pm$ 357<br>N=14 | 37.65 $\pm$ 1.05<br>N=17            | 37.93 $\pm$ 1.29<br>N=14 |
| Male                                |                                     | 4123 $\pm$ 247<br>N=14              | 4074 $\pm$ 295<br>N=12 | 40.52 $\pm$ 1.54<br>N=14            | 41.50 $\pm$ 1.94<br>N=12 |
| Genotype                            |                                     | F <sub>(1,100)</sub> =0.64, p=0.427 |                        | F <sub>(1,100)</sub> =0.42, p=0.517 |                          |
| Sex                                 |                                     | F <sub>(1,100)</sub> =0.05, p=0.826 |                        | F <sub>(1,100)</sub> =1.16, p=0.284 |                          |
| Genotype*Sex                        |                                     | F <sub>(1,100)</sub> =0.00, p=0.981 |                        | F <sub>(1,100)</sub> =0.34, p=0.561 |                          |
| Cohort                              |                                     | F <sub>(1,100)</sub> =0.55, p=0.461 |                        | F <sub>(1,100)</sub> =0.95, p=0.332 |                          |
| Weight                              |                                     | F <sub>(1,100)</sub> =2.67, p=0.105 |                        | F <sub>(1,100)</sub> =1.85, p=0.176 |                          |
| Weight*Sex                          |                                     | F <sub>(1,100)</sub> =0.01, p=0.921 |                        | F <sub>(1,100)</sub> =0.64, p=0.426 |                          |
| Weight*Cohort                       |                                     | F <sub>(1,100)</sub> =0.41, p=0.524 |                        | F <sub>(1,100)</sub> =0.34, p=0.561 |                          |
| Weight*Genotype                     |                                     | F <sub>(1,100)</sub> =0.63, p=0.430 |                        | F <sub>(1,100)</sub> =0.53, p=0.467 |                          |
| Sex*Cohort                          |                                     | F <sub>(1,100)</sub> =2.14, p=0.146 |                        | F <sub>(1,100)</sub> =0.92, p=0.340 |                          |
| Genotype*Cohort                     |                                     | F <sub>(1,100)</sub> =3.45, p=0.066 |                        | F <sub>(1,100)</sub> =0.24, p=0.624 |                          |

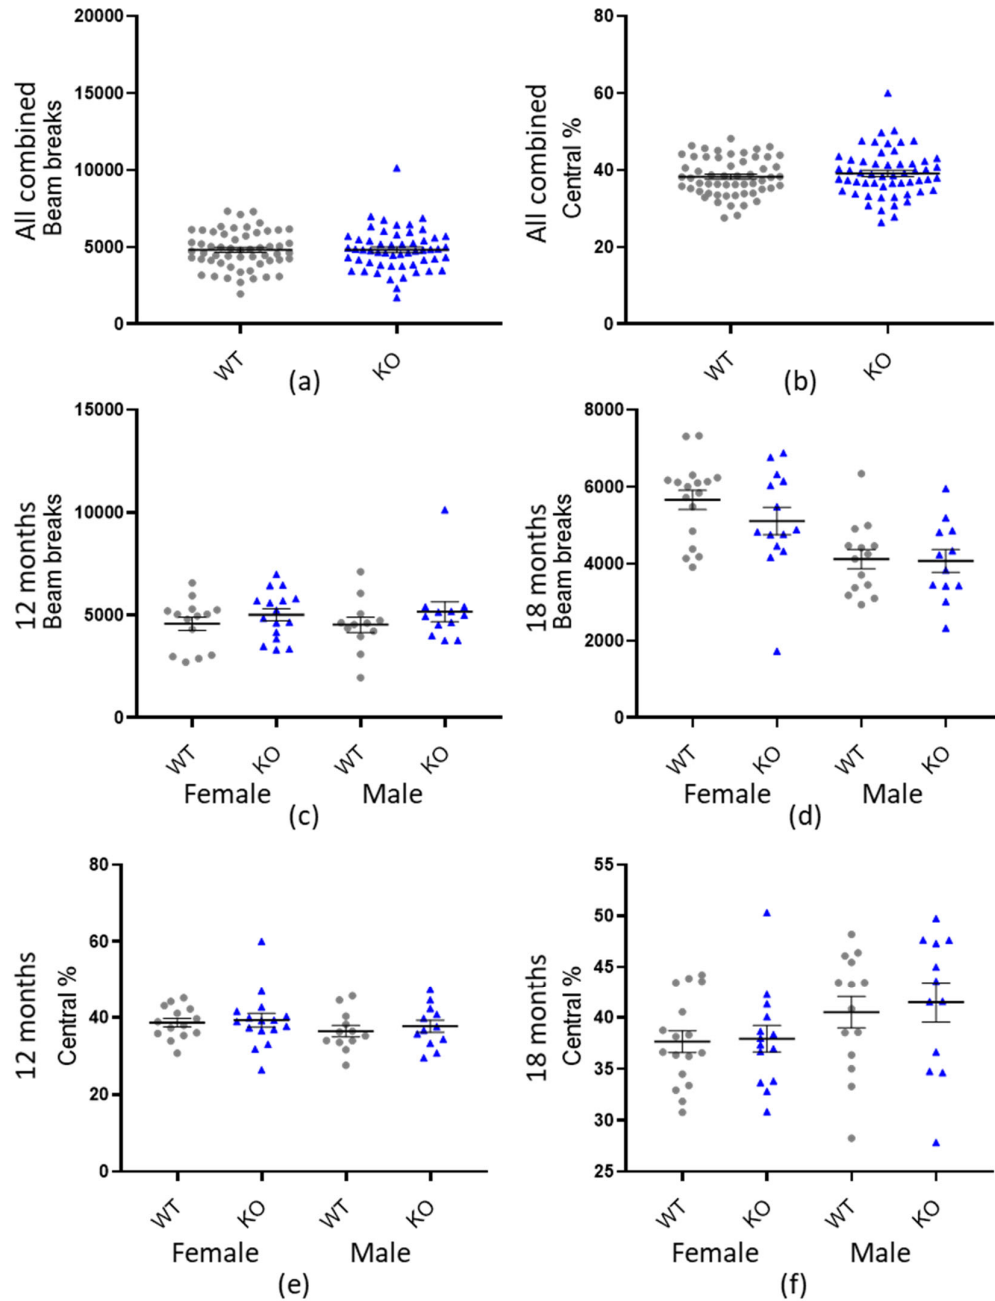

**Figure S3:** *Macrod1* KO is not associated with changes in locomotor activity or central proportion in LMA open field. Graphs show individual values dot plot, WT shown in grey circles and *Macrod1* KO in blue triangles. Error bars are the SEM. Graphs are as follows **a, c-d**) *Macrod1* LMA total beam breaks all combined, 12 and 18 months. **b, e-f**) *Macrod1* LMA central proportion (%) all combined, 12 and 18 months.

**Table S4:** Descriptive statistics of data from *Macro2* LMA Bright Field. Mean  $\pm$  SEM is presented. Individual N number is included as well as p-values for all terms and interactions. *Macro2* used a factorial-ANOVA with repeated measures, hence the term Mouse name. x = not an exact F-test.

| <i>Macro2</i><br><i>Bright Field</i> | <i>Total distance (m)</i>            |                          |                          | <i>Central (s)</i>                   |                           |
|--------------------------------------|--------------------------------------|--------------------------|--------------------------|--------------------------------------|---------------------------|
|                                      | AGE                                  | WT                       | <i>Macro2</i> KO         | WT                                   | <i>Macro2</i> KO          |
| Female                               | 3 months                             | 26.06 $\pm$ 1.00<br>N=20 | 28.44 $\pm$ 1.48<br>N=17 | 8.18 $\pm$ 1.23<br>N=20              | 6.153 $\pm$ 0.802<br>N=17 |
| Male                                 |                                      | 21.75 $\pm$ 1.02<br>N=14 | 24.69 $\pm$ 1.27<br>N=20 | 12.51 $\pm$ 1.02<br>N=14             | 9.73 $\pm$ 1.09<br>N=20   |
| Female                               | 13 months                            | 31.75 $\pm$ 2.00<br>N=15 | 32.77 $\pm$ 2.64<br>N=16 | 5.595 $\pm$ 0.869<br>N=15            | 9.37 $\pm$ 1.22<br>N=16   |
| Male                                 |                                      | 21.88 $\pm$ 1.48<br>N=13 | 26.83 $\pm$ 2.04<br>N=17 | 5.778 $\pm$ 0.954<br>N=13            | 5.595 $\pm$ 0.974<br>N=17 |
| Genotype                             | F <sub>(1,55)</sub> =3.33, p=0.072 x |                          |                          | F <sub>(1,55)</sub> =0.00, p=0.955 x |                           |
| Sex                                  | F <sub>(1,55)</sub> =1.85, p=0.179 x |                          |                          | F <sub>(1,55)</sub> =4.05, p=0.049 x |                           |
| Genotype*Sex                         | F <sub>(1,55)</sub> =0.16, p=0.692 x |                          |                          | F <sub>(1,55)</sub> =3.44, p=0.067 x |                           |
| Cohort                               | F <sub>(1,55)</sub> =0.47, p=0.497   |                          |                          | F <sub>(1,55)</sub> =1.18, p=0.283   |                           |
| Weight                               | F <sub>(1,55)</sub> =0.03, p=0.870   |                          |                          | F <sub>(1,55)</sub> =0.00, p=0.955   |                           |
| Weight*Sex                           | F <sub>(1,55)</sub> =3.73, p=0.059   |                          |                          | F <sub>(1,55)</sub> =3.27, p=0.076   |                           |
| Weight*Cohort                        | F <sub>(1,55)</sub> =0.08, p=0.781   |                          |                          | F <sub>(1,55)</sub> =1.08, p=0.303   |                           |
| Sex*Cohort                           | F <sub>(1,55)</sub> =0.95, p=0.334   |                          |                          | F <sub>(1,55)</sub> =0.97, p=0.330   |                           |
| Genotype*Cohort                      | F <sub>(1,55)</sub> =0.04, p=0.847   |                          |                          | F <sub>(1,55)</sub> =7.71, *p=0.008  |                           |
| Mouse name                           | F <sub>(1,55)</sub> =2.10, *p=0.003  |                          |                          | F <sub>(1,55)</sub> =0.96, p=0.570   |                           |

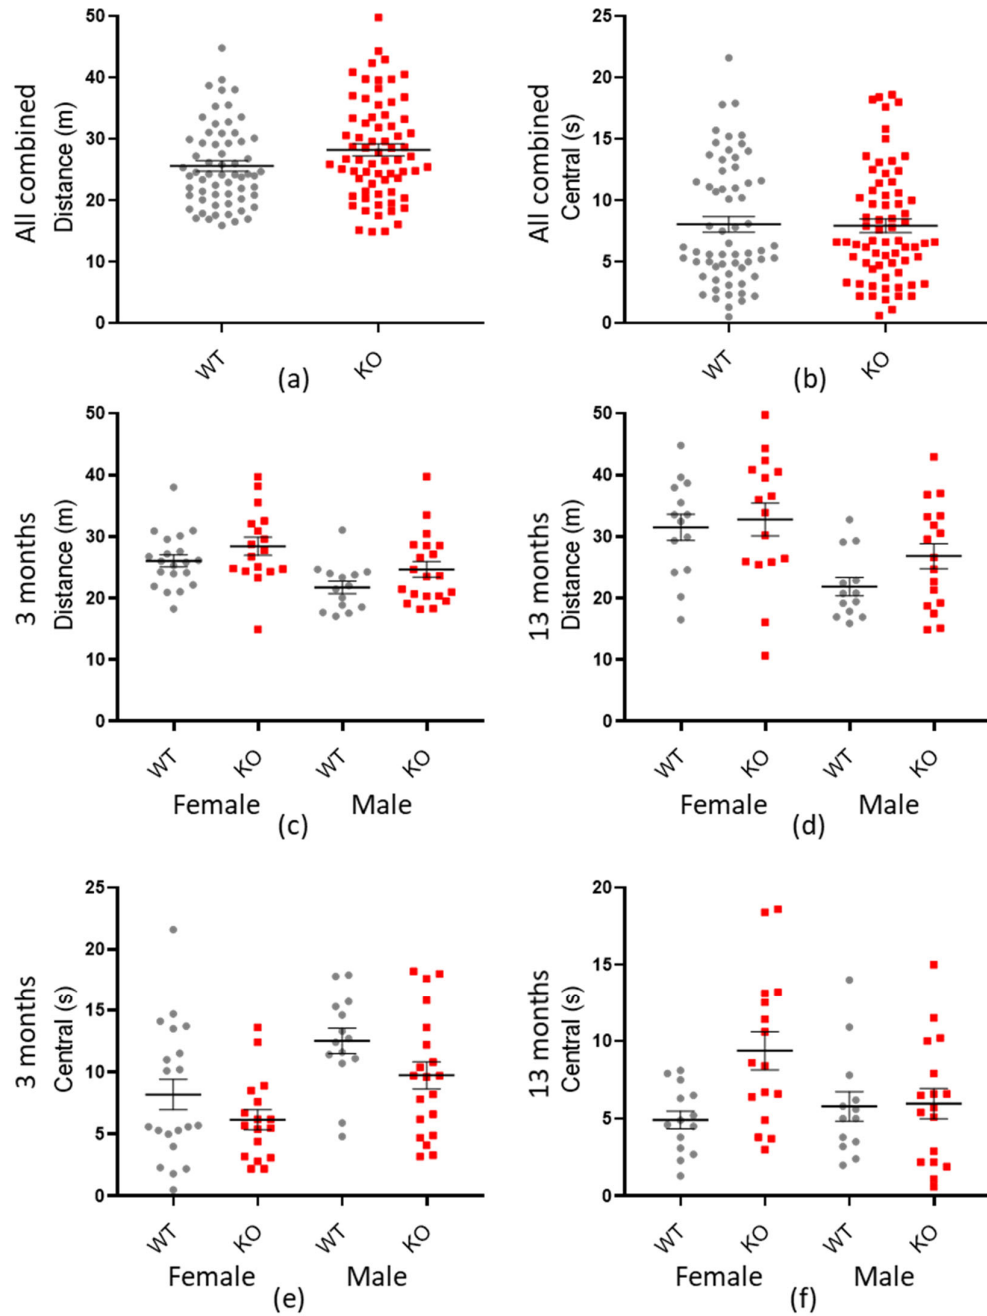

**Figure S4:** *Macrod2* KO is not associated with changes in locomotor activity or central proportion in LMA bright field. Graphs show individual values dot plot, WT shown in grey circles and *Macrod2* KO in red squares. Error bars are the SEM. Graphs are as follows **a, c-d**) total distance travelled (m) all combined, 3 and 13 months. **b, e-f**) central proportion (s) all combined, 3 and 13 months.

**Table S5:** Descriptive statistics of data from *MacroD1* LMA Bright Field. Mean  $\pm$  SEM is presented. Individual N number is included as well as p-values for all terms and interactions. MacroD1 used a factorial-ANOVA.

| <i>MacroD1</i><br><i>Bright Field</i> | <i>Total distance (m)</i> |                                     |                          | <i>Central (s)</i>                  |                           |
|---------------------------------------|---------------------------|-------------------------------------|--------------------------|-------------------------------------|---------------------------|
|                                       | AGE                       | WT                                  | <i>MacroD1</i> KO        | WT                                  | <i>MacroD1</i> KO         |
| Female                                | 12 months                 | 17.81 $\pm$ 1.29<br>N=10            | 18.62 $\pm$ 1.26<br>N=17 | 5.680 $\pm$ 0.915<br>N=10           | 4.724 $\pm$ 0.730<br>N=17 |
| Male                                  |                           | 17.41 $\pm$ 2.40<br>N=11            | 18.26 $\pm$ 2.09<br>N=12 | 6.16 $\pm$ 1.93<br>N=11             | 7.79 $\pm$ 1.48<br>N=12   |
| Female                                | 18 months                 | 19.96 $\pm$ 1.26<br>N=17            | 23.46 $\pm$ 1.60<br>N=14 | 3.765 $\pm$ 0.589<br>N=17           | 4.314 $\pm$ 0.584<br>N=14 |
| Male                                  |                           | 16.21 $\pm$ 1.50<br>N=10            | 14.83 $\pm$ 1.67<br>N=11 | 4.96 $\pm$ 1.66<br>N=10             | 4.03 $\pm$ 1.10<br>N=11   |
| Genotype                              |                           | F <sub>(1,91)</sub> =0.34, p=0.559  |                          | F <sub>(1,91)</sub> =1.57, p=0.214  |                           |
| Sex                                   |                           | F <sub>(1,91)</sub> =1.00, p=0.320  |                          | F <sub>(1,91)</sub> =0.16, p=0.687  |                           |
| Genotype*Sex                          |                           | F <sub>(1,91)</sub> =2.35, p=0.129  |                          | F <sub>(1,91)</sub> =0.64, p=0.427  |                           |
| Cohort                                |                           | F <sub>(1,91)</sub> =3.27, p=0.074  |                          | F <sub>(1,91)</sub> =7.16, *p=0.009 |                           |
| Weight                                |                           | F <sub>(1,91)</sub> =5.49, *p=0.021 |                          | F <sub>(1,91)</sub> =4.02, *p=0.048 |                           |
| Weight*Sex                            |                           | F <sub>(1,91)</sub> =1.10, p=0.297  |                          | F <sub>(1,91)</sub> =0.01, p=0.914  |                           |
| Weight*Cohort                         |                           | F <sub>(1,91)</sub> =4.19, *p=0.043 |                          | F <sub>(1,91)</sub> =6.30, *p=0.014 |                           |
| Weight*Genotype                       |                           | F <sub>(1,91)</sub> =0.40, p=0.529  |                          | F <sub>(1,91)</sub> =1.51, p=0.222  |                           |
| Sex*Cohort                            |                           | F <sub>(1,91)</sub> =6.78, *p=0.011 |                          | F <sub>(1,91)</sub> =5.23, *p=0.024 |                           |
| Genotype*Cohort                       |                           | F <sub>(1,91)</sub> =0.04, p=0.849  |                          | F <sub>(1,91)</sub> =0.17, p=0.680  |                           |

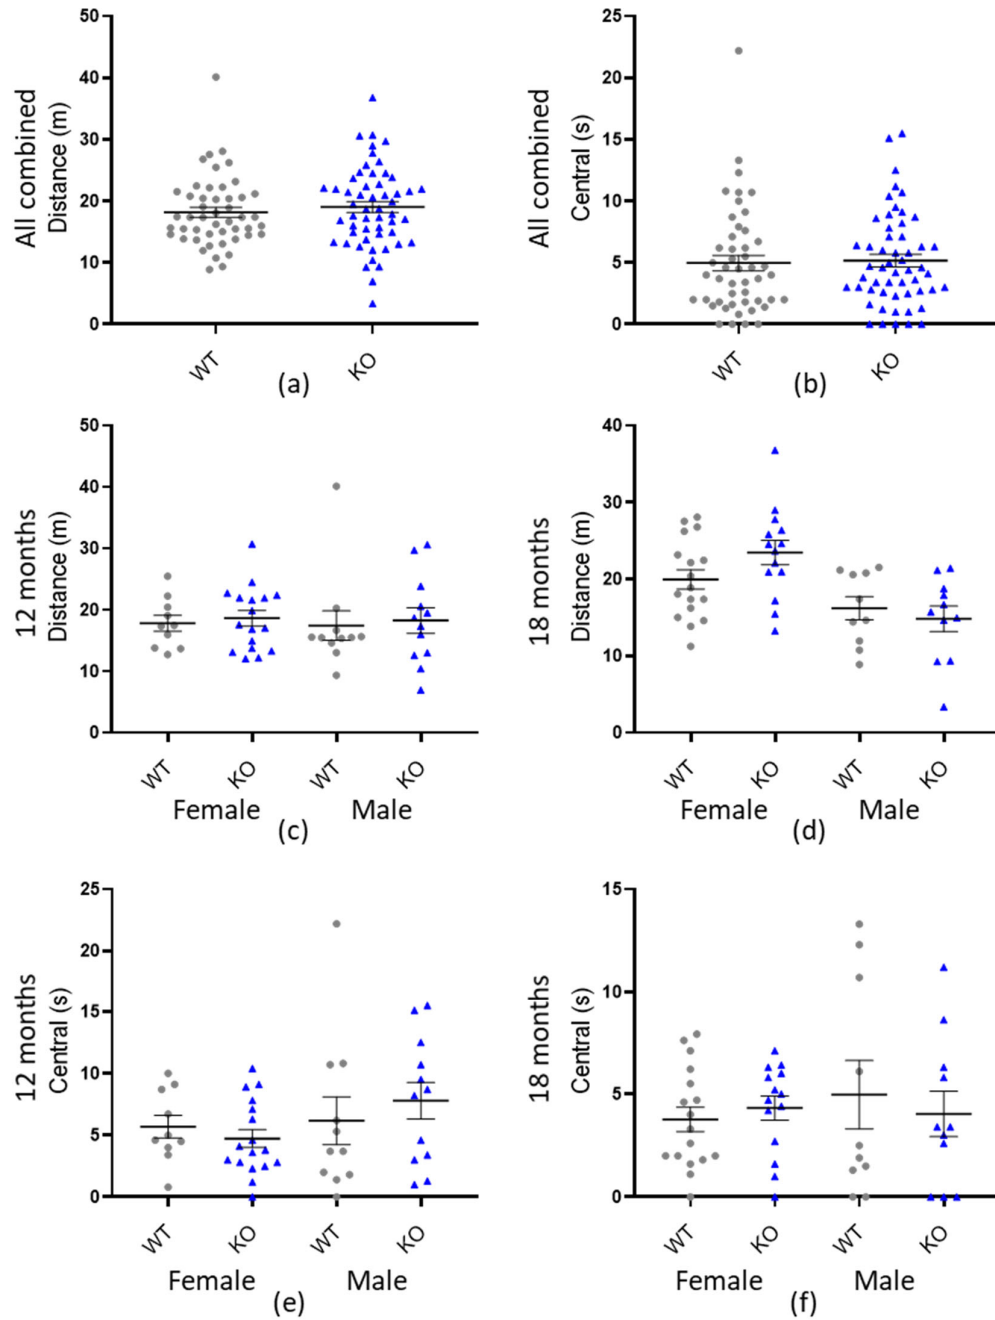

**Figure S5:** *MacroD1* KO is not associated with changes in locomotor activity or central proportion in LMA bright field. Graphs show individual values dot plot, WT shown in grey circles and *MacroD1* KO in blue triangles. Error bars are the SEM. Graphs are as follows **a, c-d** total distance travelled (m), all data combined, 12 and 18 months. **b, e-f** central proportion (s) all combined, 12 and 18 months.



**Table S6:** Descriptive statistics of preference ratio from *Macro2* Y-maze preference test. Mean  $\pm$  SEM is presented. Individual N number is included as well as p-values for all terms and interactions. *Macro2* used a factorial-ANOVA with repeated measures, hence the term Mouse name. x = not an exact F-test.

| <i>Macro2</i><br>Y-maze | Preference ratio |                                      |                             |
|-------------------------|------------------|--------------------------------------|-----------------------------|
|                         | AGE              | WT                                   | <i>Macro2</i> KO            |
| Female                  | 3 months         | 0.7169 $\pm$ 0.0359<br>N=17          | 0.6886 $\pm$ 0.0376<br>N=15 |
| Male                    |                  | 0.7628 $\pm$ 0.0251<br>N=13          | 0.6594 $\pm$ 0.0223<br>N=20 |
| Female                  | 13 months        | 0.6006 $\pm$ 0.0528<br>N=16          | 0.6075 $\pm$ 0.0527<br>N=16 |
| Male                    |                  | 0.6127 $\pm$ 0.0614<br>N=13          | 0.6107 $\pm$ 0.0563<br>N=17 |
| Genotype                |                  | F <sub>(1,51)</sub> =0.41, p=0.522 x |                             |
| Sex                     |                  | F <sub>(1,51)</sub> =0.31, p=0.580 x |                             |
| Genotype*Sex            |                  | F <sub>(1,51)</sub> =0.65, p=0.423 x |                             |
| Cohort                  |                  | F <sub>(1,51)</sub> =0.35, p=0.557   |                             |
| Weight                  |                  | F <sub>(1,51)</sub> =0.07, p=0.787   |                             |
| Weight*Sex              |                  | F <sub>(1,51)</sub> =0.40, p=0.531   |                             |
| Weight*Cohort           |                  | F <sub>(1,51)</sub> =0.11, p=0.737   |                             |
| Sex*Cohort              |                  | F <sub>(1,51)</sub> =0.38, p=0.543   |                             |
| Genotype*Cohort         |                  | F <sub>(1,51)</sub> =1.09, p=0.301   |                             |
| Mouse name              |                  | F <sub>(1,51)</sub> =1.05, p=0.436   |                             |

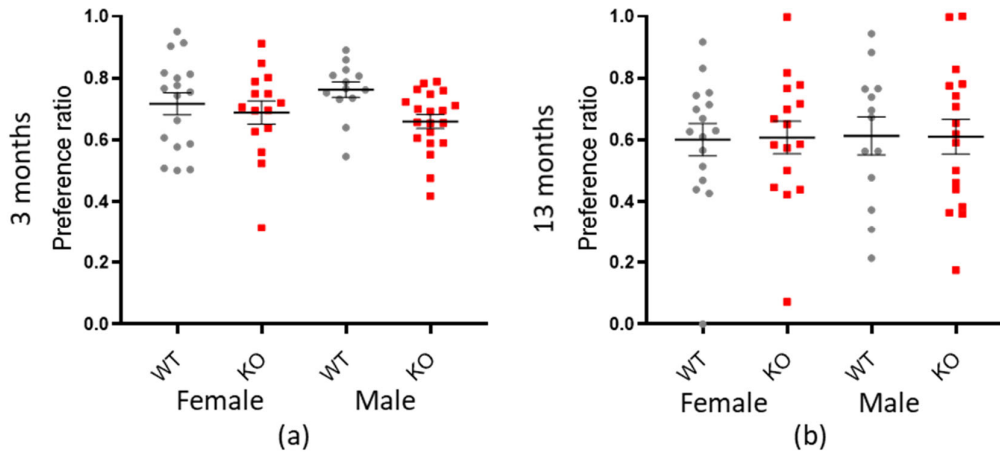

**Figure S6:** *Macro2* KO is not associated with changes in short term memory and attention. Graphs show individual values dot plot, WT shown in grey circles and *Macro2* KO in red squares. Error bars are the SEM. Graphs are as follows **a-b**) Preference ratio (from y-maze preference test) at 3 and 13 months.

**Table S7:** Descriptive statistics of data from *MacroD1* LMA Bright Field. Mean  $\pm$  SEM is presented. Individual N number is included as well as p-values for all terms and interactions. *MacroD1* used a factorial-ANOVA.

| <i>MacroD1</i><br>Y-maze | <i>Preference ratio</i> |                                     |                             | <i>Distance travelled (m)</i>        |                           |
|--------------------------|-------------------------|-------------------------------------|-----------------------------|--------------------------------------|---------------------------|
|                          | AGE                     | WT                                  | <i>MacroD1</i> KO           | WT                                   | <i>MacroD1</i> KO         |
| Female                   | 12 months               | 0.6980 $\pm$ 0.0371<br>N=13         | 0.5785 $\pm$ 0.0571<br>N=17 | 6.113 $\pm$ 0.210<br>N=13            | 5.071 $\pm$ 0.396<br>N=17 |
| Male                     |                         | 0.6845 $\pm$ 0.0432<br>N=18         | 0.6689 $\pm$ 0.0507<br>N=13 | 4.953 $\pm$ 0.335<br>N=18            | 5.209 $\pm$ 0.299<br>N=13 |
| Female                   | 18 months               | 0.6703 $\pm$ 0.0526<br>N=17         | 0.6294 $\pm$ 0.0638<br>N=15 | 5.036 $\pm$ 0.510<br>N=17            | 4.996 $\pm$ 0.335<br>N=15 |
| Male                     |                         | 0.5626 $\pm$ 0.0858<br>N=13         | 0.4771 $\pm$ 0.0662<br>N=12 | 3.573 $\pm$ 0.413<br>N=13            | 3.677 $\pm$ 0.440<br>N=12 |
| Genotype                 |                         | F <sub>(1,107)</sub> =0.06, p=0.805 |                             | F <sub>(1,107)</sub> =9.30, *p=0.003 |                           |
| Sex                      |                         | F <sub>(1,107)</sub> =1.67, p=0.200 |                             | F <sub>(1,107)</sub> =0.49, p=0.485  |                           |
| Genotype*Sex             |                         | F <sub>(1,107)</sub> =0.01, p=0.910 |                             | F <sub>(1,107)</sub> =1.06, p=0.306  |                           |
| Cohort                   |                         | F <sub>(1,107)</sub> =0.11, p=0.735 |                             | F <sub>(1,107)</sub> =0.26, p=0.612  |                           |
| Weight                   |                         | F <sub>(1,107)</sub> =0.53, p=0.468 |                             | F <sub>(1,107)</sub> =2.50, p=0.117  |                           |
| Weight*Sex               |                         | F <sub>(1,107)</sub> =2.36, p=0.127 |                             | F <sub>(1,107)</sub> =0.21, p=0.652  |                           |
| Weight*Cohort            |                         | F <sub>(1,107)</sub> =0.40, p=0.528 |                             | F <sub>(1,107)</sub> =0.02, p=0.879  |                           |
| Weight*Genotype          |                         | F <sub>(1,107)</sub> =0.00, p=0.966 |                             | F <sub>(1,107)</sub> =8.71, *p=0.004 |                           |
| Sex*Cohort               |                         | F <sub>(1,107)</sub> =0.07, p=0.790 |                             | F <sub>(1,107)</sub> =1.87, p=0.175  |                           |
| Genotype*Cohort          |                         | F <sub>(1,107)</sub> =0.00, p=0.995 |                             | F <sub>(1,107)</sub> =0.17, p=0.385  |                           |

**Table S8:** Descriptive statistics of distance travelled data from *MacroD1* distance travelled Y-maze preference test. Mean  $\pm$  SEM is presented. Individual N number is included as well as p-values for all terms and interactions. Statistics was performed on all factors combined using a factorial-ANOVA. Whereas, separated by sex and age cohort comparisons used an ANCOVA (weight as a co-variable). The difference between the means is presented alongside a Cohen's d-score to demonstrate effect size.

| <i>MacroD1</i><br><i>Y-maze</i> | AGE       | Total distance (m)               |                           |                |           |                                 |
|---------------------------------|-----------|----------------------------------|---------------------------|----------------|-----------|---------------------------------|
|                                 |           | WT                               | <i>MacroD1</i> KO         | Difference (m) | Cohen's d | <i>p-value</i>                  |
| Female                          | 12 months | 6.113 $\pm$ 0.210<br>N=13        | 5.071 $\pm$ 0.396<br>N=17 | 1.042          | 0.740     | $F_{(1,27)}=4.31$ , * $p=0.047$ |
| Male                            |           | 4.953 $\pm$ 0.335<br>N=18        | 5.209 $\pm$ 0.299<br>N=13 | 0.256          | 0.201     | $F_{(1,28)}=0.03$ , $p=0.869$   |
| Female                          | 18 months | 5.036 $\pm$ 0.510<br>N=17        | 4.996 $\pm$ 0.335<br>N=15 | 0.04           | 0.023     | $F_{(1,29)}=0.07$ , $p=0.791$   |
| Male                            |           | 3.573 $\pm$ 0.413<br>N=13        | 3.677 $\pm$ 0.440<br>N=12 | 0.104          | 0.071     | $F_{(1,22)}=0.00$ , $p=0.958$   |
| Genotype                        |           | $F_{(1,107)}=9.30$ , * $p=0.003$ |                           |                |           |                                 |
| Sex                             |           | $F_{(1,107)}=0.49$ , $p=0.485$   |                           |                |           |                                 |
| Genotype*Sex                    |           | $F_{(1,107)}=1.06$ , $p=0.306$   |                           |                |           |                                 |
| Cohort                          |           | $F_{(1,107)}=0.26$ , $p=0.612$   |                           |                |           |                                 |
| Weight                          |           | $F_{(1,107)}=2.50$ , $p=0.117$   |                           |                |           |                                 |
| Weight*Sex                      |           | $F_{(1,107)}=0.21$ , $p=0.652$   |                           |                |           |                                 |
| Weight*Cohort                   |           | $F_{(1,107)}=0.02$ , $p=0.879$   |                           |                |           |                                 |
| Weight*Genotype                 |           | $F_{(1,107)}=8.71$ , * $p=0.004$ |                           |                |           |                                 |
| Sex*Cohort                      |           | $F_{(1,107)}=1.87$ , $p=0.175$   |                           |                |           |                                 |
| Genotype*Cohort                 |           | $F_{(1,107)}=0.17$ , $p=0.385$   |                           |                |           |                                 |

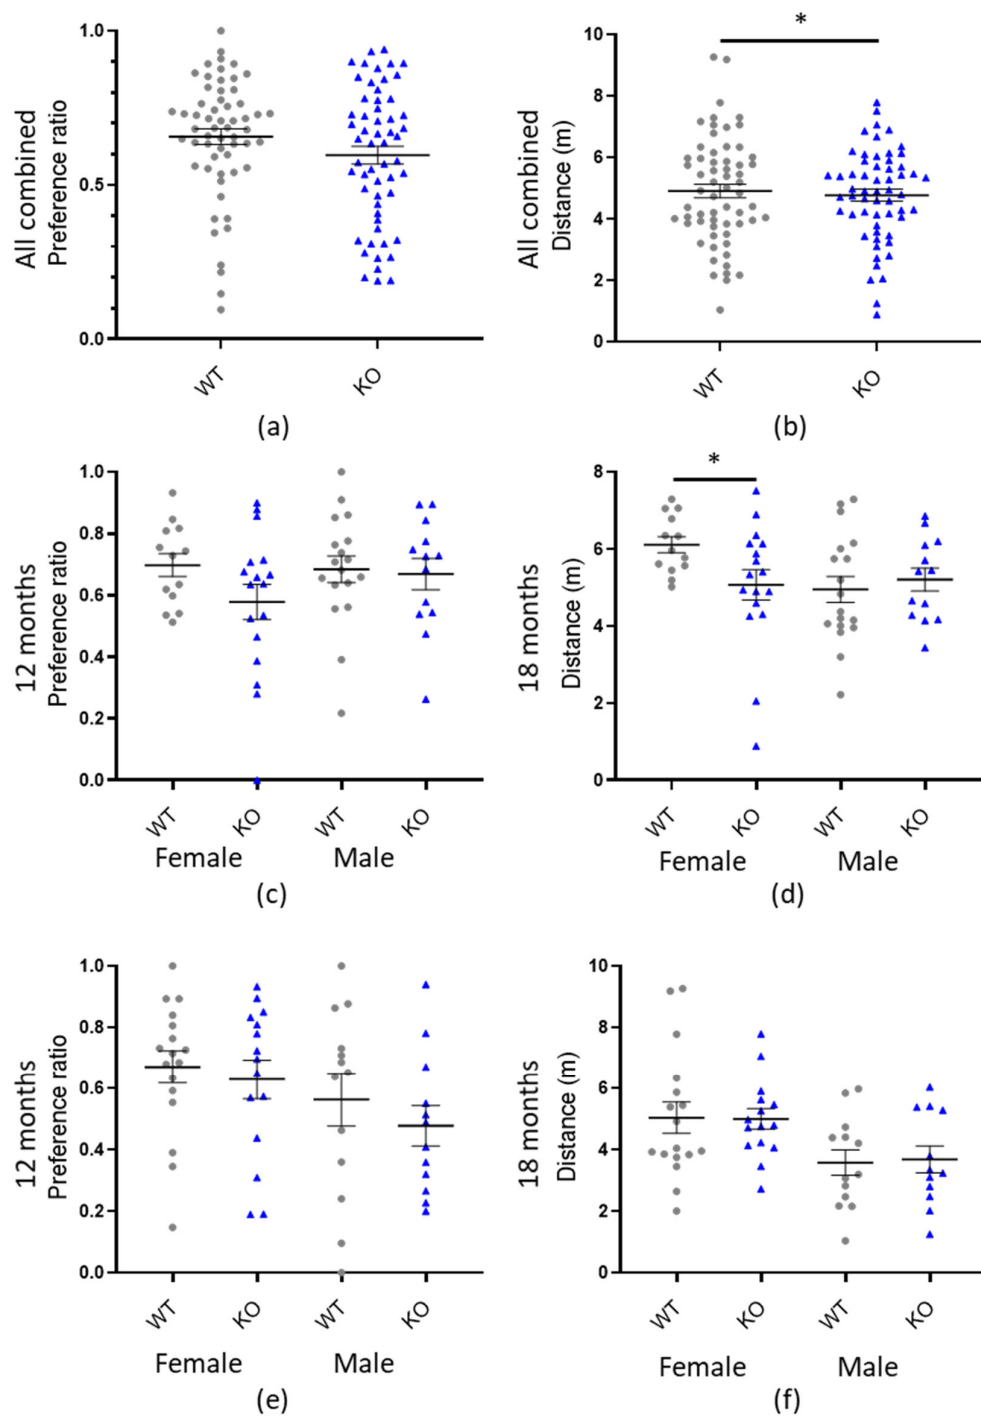

**Figure S7:** *Macrodl1* KO is not associated with changes in short term memory and attention. Results from the Y-maze preference test. Graphs show individual values dot plot, WT shown in grey circles and *Macrodl1* KO in blue triangles. Error bars are the SEM. Graphs are as follows **a, c-d**) preference ratio, all data combined, 12 and 18 months. **b, e-f**) total distance travelled (m) all combined, 12 and 18 months. Significant differences for

Macrodl distance travelled only **b)** overall  $F_{(1,107)}=9.30$ ,  $*p=0.003$  and **d)** 18 month old female mice  $F_{(1,27)}=4.31$ ,  $*p=0.047$ .

**Table S9:** Descriptive statistics of SQRFore and hind paw intensity for *Macrodl* from the catwalk gait analysis. SQRFore = square root transformed. Mean  $\pm$  SEM is presented. Individual N number is included as well as p-values for all terms and interactions. Statistics was performed on all factors combined using a factorial-ANOVA.

| <i>Macrodl</i><br>Catwalk | SQRForepaw Intensity (arbitrary) |                                    |                             | SQRForeHind Paw Intensity (arbitrary) |                             |
|---------------------------|----------------------------------|------------------------------------|-----------------------------|---------------------------------------|-----------------------------|
|                           | AGE                              | WT                                 | <i>Macrodl</i> KO           | WT                                    | <i>Macrodl</i> KO           |
| Female                    | 12 months                        | 8.915 $\pm$ 0.117<br>N=13          | 8.8614 $\pm$ 0.0731<br>N=15 | 8.860 $\pm$ 0.137<br>N=13             | 8.7937 $\pm$ 0.0778<br>N=15 |
| Male                      |                                  | 9.3944 $\pm$ 0.0658<br>N=19        | 9.1560 $\pm$ 0.0924<br>N=14 | 9.0620 $\pm$ 0.0387<br>N=19           | 9.0842 $\pm$ 0.0861<br>N=14 |
| Female                    | 18 months                        | 9.168 $\pm$ 0.133<br>N=16          | 8.9842 $\pm$ 0.087<br>N=13  | 8.879 $\pm$ 0.126<br>N=16             | 8.788 $\pm$ 0.109<br>N=13   |
| Male                      |                                  | 9.7048 $\pm$ 0.0676<br>N=12        | 9.4507 $\pm$ 0.0874<br>N=12 | 9.1770 $\pm$ 0.0709<br>N=12           | 9.090 $\pm$ 0.115<br>N=12   |
| Genotype                  |                                  | $F_{(1,103)}=0.03$ , $p=0.859$     |                             | $F_{(1,103)}=0.64$ , $p=0.426$        |                             |
| Sex                       |                                  | $F_{(1,103)}=0.17$ , $p=0.682$     |                             | $F_{(1,103)}=0.39$ , $p=0.535$        |                             |
| Genotype*Sex              |                                  | $F_{(1,103)}=0.07$ , $p=0.794$     |                             | $F_{(1,103)}=0.01$ , $p=0.906$        |                             |
| Cohort                    |                                  | $F_{(1,103)}=0.01$ , $p=0.940$     |                             | $F_{(1,103)}=0.15$ , $p=0.696$        |                             |
| Weight                    |                                  | $F_{(1,103)}=13.15$ , $*p < 0.001$ |                             | $F_{(1,103)}=0.02$ , $p=0.902$        |                             |
| Weight*Sex                |                                  | $F_{(1,103)}=0.00$ , $p=0.949$     |                             | $F_{(1,103)}=1.41$ , $p=0.238$        |                             |
| Weight*Cohort             |                                  | $F_{(1,103)}=0.01$ , $p=0.932$     |                             | $F_{(1,103)}=0.10$ , $p=0.758$        |                             |
| Weight*Genotype           |                                  | $F_{(1,103)}=0.02$ , $p=0.891$     |                             | $F_{(1,103)}=0.52$ , $p=0.473$        |                             |
| Sex*Cohort                |                                  | $F_{(1,103)}=0.23$ , $p=0.635$     |                             | $F_{(1,103)}=0.01$ , $p=0.941$        |                             |
| Genotype*Cohort           |                                  | $F_{(1,103)}=0.11$ , $p=0.739$     |                             | $F_{(1,103)}=0.65$ , $p=0.424$        |                             |

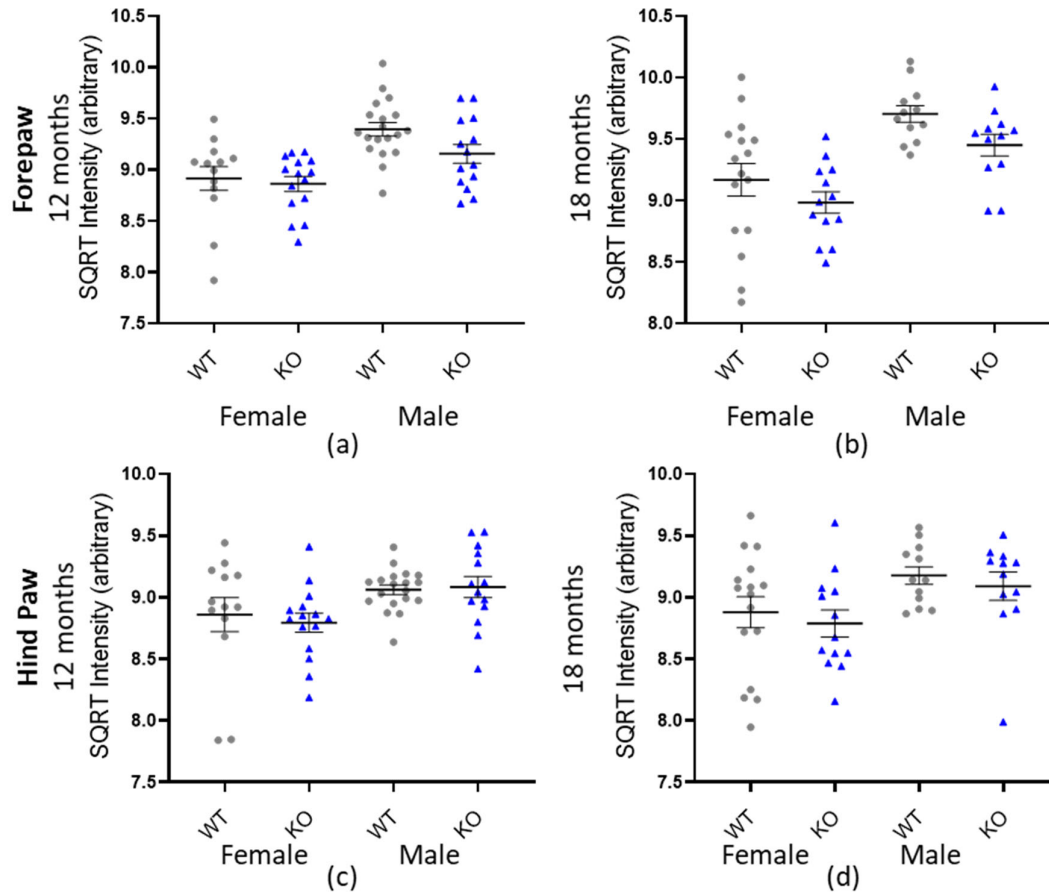

**Figure S8:** *Macrodl* KO is not associated with changes fore or hind paw foot pressure. Results from catwalk gait analysis. Graphs show individual values dot plot, WT shown in grey circles and *Macrodl* KO in blue triangles. SQRT = Square-root transformed. Error bars are the SEM. Graphs are as follows, **a-b)** forepaw intensity at 12 and 18 months, **c-d)** hind paw intensity at 12 and 18 months.

**Table S10:** Descriptive statistics of gait velocity and SQRT gait cadence for *Macrodl* from the catwalk gait analysis. SQRT = square root transformed. Mean  $\pm$  SEM is presented. Individual N number is included as well as p-values for all terms and interactions. Statistics was performed on all factors combined using a factorial-ANOVA.

| <i>Macrodl</i><br>Catwalk | Gait Velocity (cm/s) |                                     |                            | SQRT Gait Cadence (steps/minute)    |                             |
|---------------------------|----------------------|-------------------------------------|----------------------------|-------------------------------------|-----------------------------|
|                           | AGE                  | WT                                  | <i>Macrodl</i> KO          | WT                                  | <i>Macrodl</i> KO           |
| Female                    | 12 months            | 23.13 $\pm$ 1.07<br>N=13            | 25.15 $\pm$ 1.92<br>N=15   | 3.9224 $\pm$ 0.0905<br>N=13         | 3.955 $\pm$ 0.102<br>N=15   |
| Male                      |                      | 20.835 $\pm$ 0.709<br>N=19          | 21.25 $\pm$ 1.16<br>N=14   | 6.16 $\pm$ 0.0507<br>N=19           | 3.7590 $\pm$ 0.0592<br>N=14 |
| Female                    | 18 months            | 20.122 $\pm$ 0.800<br>N=16          | 21.75 $\pm$ 1.19<br>N=13   | 3.7547 $\pm$ 0.0613<br>N=16         | 3.7539 $\pm$ 0.0733<br>N=13 |
| Male                      |                      | 20.716 $\pm$ 0.978<br>N=12          | 19.145 $\pm$ 0.919<br>N=12 | 3.6609 $\pm$ 0.0784<br>N=12         | 3.5930 $\pm$ 0.0594<br>N=12 |
| Genotype                  |                      | F <sub>(1,103)</sub> =0.03, p=0.860 |                            | F <sub>(1,103)</sub> =0.48, p=0.489 |                             |
| Sex                       |                      | F <sub>(1,103)</sub> =0.09, p=0.767 |                            | F <sub>(1,103)</sub> =0.00, p=0.991 |                             |

|                 |                             |                             |
|-----------------|-----------------------------|-----------------------------|
| Genotype*Sex    | $F_{(1,103)}=2.04, p=0.156$ | $F_{(1,103)}=2.28, p=0.134$ |
| Cohort          | $F_{(1,103)}=0.50, p=0.479$ | $F_{(1,103)}=0.87, p=0.352$ |
| Weight          | $F_{(1,103)}=2.55, p=0.113$ | $F_{(1,103)}=2.08, p=0.152$ |
| Weight*Sex      | $F_{(1,103)}=0.18, p=0.673$ | $F_{(1,103)}=0.01, p=0.914$ |
| Weight*Cohort   | $F_{(1,103)}=0.26, p=0.613$ | $F_{(1,103)}=0.32, p=0.573$ |
| Weight*Genotype | $F_{(1,103)}=0.06, p=0.807$ | $F_{(1,103)}=0.57, p=0.450$ |
| Sex*Cohort      | $F_{(1,103)}=0.49, p=0.483$ | $F_{(1,103)}=0.30, p=0.583$ |
| Genotype*Cohort | $F_{(1,103)}=0.49, p=0.486$ | $F_{(1,103)}=0.03, p=0.859$ |

**Table S11:** Descriptive statistics of forefoot swing speed and forefoot stride length for *MacroD1* from the catwalk gait analysis. Mean  $\pm$  SEM is presented. Individual N number is included as well as p-values for all terms and interactions. Statistics was performed on all factors combined using a factorial-ANOVA.

| <i>MacroD1</i><br>Catwalk | <i>Forefoot Swing Speed (cm/s)</i> |                          |                          | <i>Forefoot Stride Length (cm)</i> |                           |
|---------------------------|------------------------------------|--------------------------|--------------------------|------------------------------------|---------------------------|
|                           | AGE                                | WT                       | <i>MacroD1</i> KO        | WT                                 | <i>MacroD1</i> KO         |
| Female                    | 12 months                          | 54.34 $\pm$ 1.81<br>N=13 | 56.94 $\pm$ 3.08<br>N=15 | 5.995 $\pm$ 0.188<br>N=13          | 6.065 $\pm$ 0.191<br>N=15 |
| Male                      |                                    | 51.96 $\pm$ 1.03<br>N=19 | 52.26 $\pm$ 1.96<br>N=14 | 5.856 $\pm$ 0.126<br>N=19          | 5.813 $\pm$ 0.175<br>N=14 |
| Female                    | 18 months                          | 50.92 $\pm$ 1.66<br>N=16 | 53.16 $\pm$ 2.26<br>N=13 | 6.134 $\pm$ 0.128<br>N=16          | 6.058 $\pm$ 0.138<br>N=13 |
| Male                      |                                    | 54.89 $\pm$ 1.87<br>N=12 | 49.08 $\pm$ 1.91<br>N=12 | 6.081 $\pm$ 0.170<br>N=12          | 5.736 $\pm$ 0.181<br>N=12 |
| Genotype                  | $F_{(1,103)}=0.35, p=0.558$        |                          |                          | $F_{(1,103)}=0.01, p=0.939$        |                           |
| Sex                       | $F_{(1,103)}=0.01, p=0.905$        |                          |                          | $F_{(1,103)}=1.50, p=0.223$        |                           |
| Genotype*Sex              | $F_{(1,103)}=2.82, p=0.096$        |                          |                          | $F_{(1,103)}=0.44, p=0.508$        |                           |
| Cohort                    | $F_{(1,103)}=0.50, p=0.479$        |                          |                          | $F_{(1,103)}=0.05, p=0.827$        |                           |
| Weight                    | $F_{(1,103)}=0.00, p=0.970$        |                          |                          | $F_{(1,103)}=0.52, p=0.473$        |                           |
| Weight*Sex                | $F_{(1,103)}=0.08, p=0.780$        |                          |                          | $F_{(1,103)}=1.85, p=0.177$        |                           |
| Weight*Cohort             | $F_{(1,103)}=0.28, p=0.597$        |                          |                          | $F_{(1,103)}=0.00, p=0.949$        |                           |
| Weight*Genotype           | $F_{(1,103)}=0.34, p=0.561$        |                          |                          | $F_{(1,103)}=0.05, p=0.817$        |                           |
| Sex*Cohort                | $F_{(1,103)}=0.37, p=0.547$        |                          |                          | $F_{(1,103)}=0.44, p=0.510$        |                           |
| Genotype*Cohort           | $F_{(1,103)}=1.40, p=0.240$        |                          |                          | $F_{(1,103)}=0.51, p=0.476$        |                           |

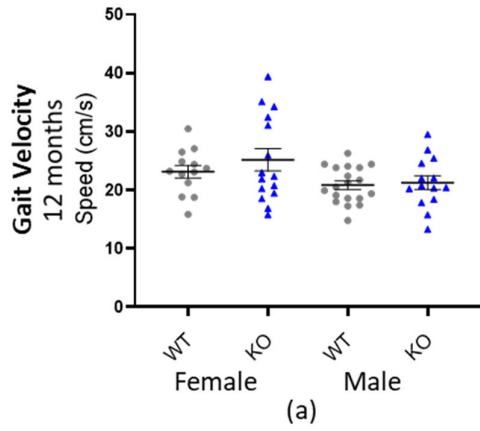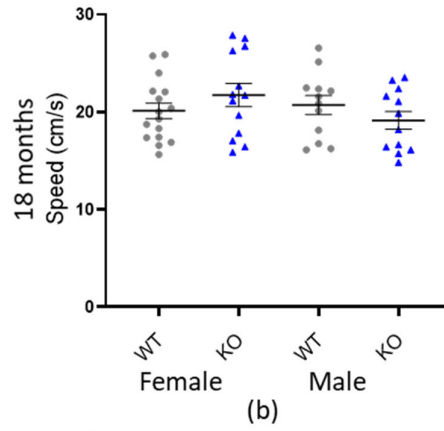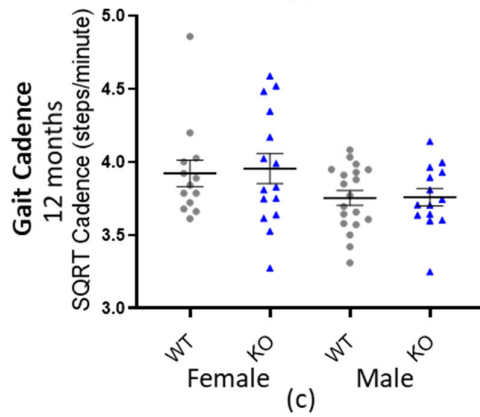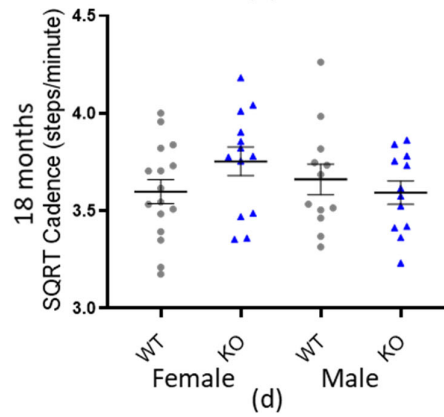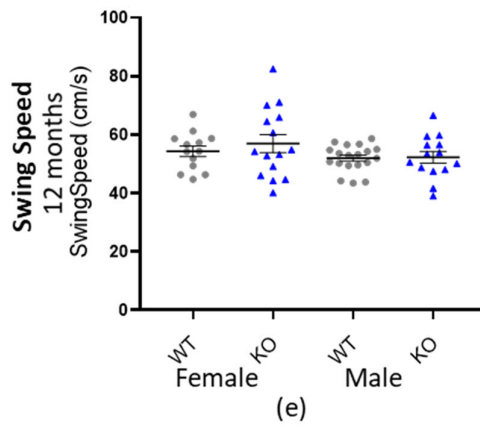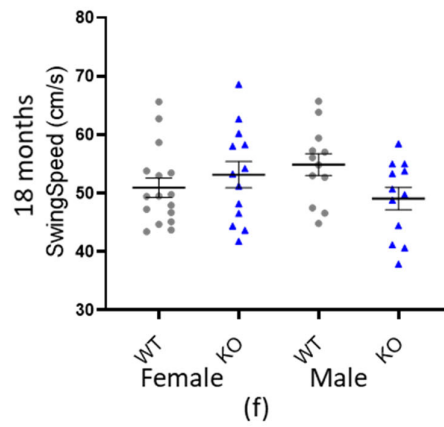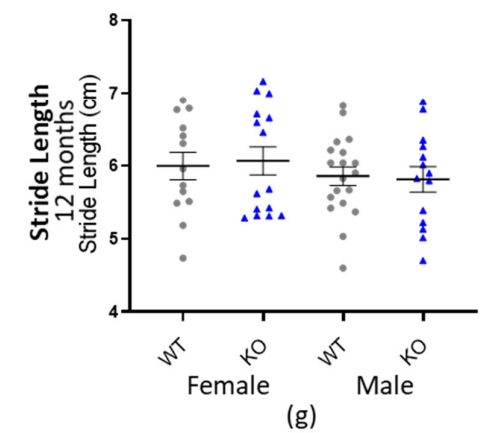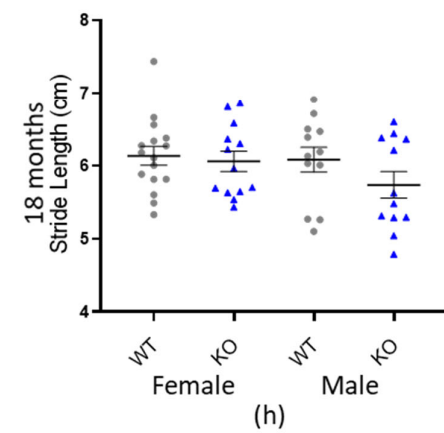



**Figure S9:** *Macro1* KO is not associated an altered gait. Results from catwalk gait analysis. Graphs show individual values dot plot, WT shown in grey circles and *Macro1* KO in blue triangles. SQRT = Square-root transformed. Error bars are the SEM. Graphs are as follows, **a-b**) gait velocity (average speed cm/s) at 12 and 18 months, **c-d**) SQRT gait cadence (steps/minute) at 12 and 18 months, **e-f**) Forefoot swing speed (cm/s) at 12 and 18 months, and **g-h**) forefoot stride length (cm) at 12 and 18 months.

**Table S12:** Descriptive statistics of SQRT-fore and hind paw intensity for *Macro2* from the catwalk gait analysis. SQRT = square root transformed. Mean  $\pm$  SEM is presented. Individual N number is included as well as p-values for all terms and interactions. *Macro2* used a factorial-ANOVA with repeated measures, hence the term Mouse name. x = not an exact F-test.

| <i>Macro2</i><br>Catwalk | SQRT-Forepaw Intensity (arbitrary)    |                             |                             | SQRT-Hind Paw Intensity (arbitrary)  |                             |
|--------------------------|---------------------------------------|-----------------------------|-----------------------------|--------------------------------------|-----------------------------|
|                          | AGE                                   | WT                          | <i>Macro1</i> KO            | WT                                   | <i>Macro1</i> KO            |
| Female                   | 3 months                              | 8.6722 $\pm$ 0.0346<br>N=20 | 8.6733 $\pm$ 0.0522<br>N=17 | 8.9759 $\pm$ 0.0616<br>N=20          | 9.0381 $\pm$ 0.0578<br>N=17 |
| Male                     |                                       | 8.9180 $\pm$ 0.0705<br>N=13 | 8.8875 $\pm$ 0.0400<br>N=17 | 9.0652 $\pm$ 0.0811<br>N=13          | 9.1627 $\pm$ 0.0794<br>N=17 |
| Female                   | 13 months                             | 8.1452 $\pm$ 0.0979<br>N=16 | 8.4966 $\pm$ 0.0942<br>N=16 | 7.959 $\pm$ 0.140<br>N=16            | 8.657 $\pm$ 0.116<br>N=16   |
| Male                     |                                       | 8.716 $\pm$ 0.104<br>N=13   | 8.302 $\pm$ 0.100<br>N=17   | 8.557 $\pm$ 0.137<br>N=13            | 8.230 $\pm$ 0.147<br>N=17   |
| Genotype                 | F <sub>(1,54)</sub> =0.46, p=0.501 x  |                             |                             | F <sub>(1,54)</sub> =1.54, p=0.219 x |                             |
| Sex                      | F <sub>(1,54)</sub> =0.56, p=0.456 x  |                             |                             | F <sub>(1,54)</sub> =0.56, p=0.456 x |                             |
| Genotype*Sex             | F <sub>(1,54)</sub> =8.31, *p=0.005 x |                             |                             | F <sub>(1,54)</sub> =7.47, p=0.008 x |                             |
| Cohort                   | F <sub>(1,54)</sub> =1.99, p=0.164    |                             |                             | F <sub>(1,54)</sub> =3.79, p=0.057   |                             |
| Weight                   | F <sub>(1,54)</sub> =1.19, p=0.280    |                             |                             | F <sub>(1,54)</sub> =0.01, p=0.935   |                             |
| Weight*Sex               | F <sub>(1,54)</sub> =0.51, p=0.479    |                             |                             | F <sub>(1,54)</sub> =0.04, p=0.835   |                             |
| Weight*Cohort            | F <sub>(1,54)</sub> =0.20, p=0.657    |                             |                             | F <sub>(1,54)</sub> =1.06, p=0.309   |                             |
| Sex*Cohort               | F <sub>(1,54)</sub> =1.21, p=0.276    |                             |                             | F <sub>(1,54)</sub> =0.81, p=0.373   |                             |
| Genotype*Cohort          | F <sub>(1,54)</sub> =0.01, p=0.936    |                             |                             | F <sub>(1,54)</sub> =1.80, p=0.186   |                             |
| Mouse Name               | F <sub>(1,54)</sub> =0.96, p=0.558    |                             |                             | F <sub>(1,54)</sub> =1.30, p=0.158   |                             |

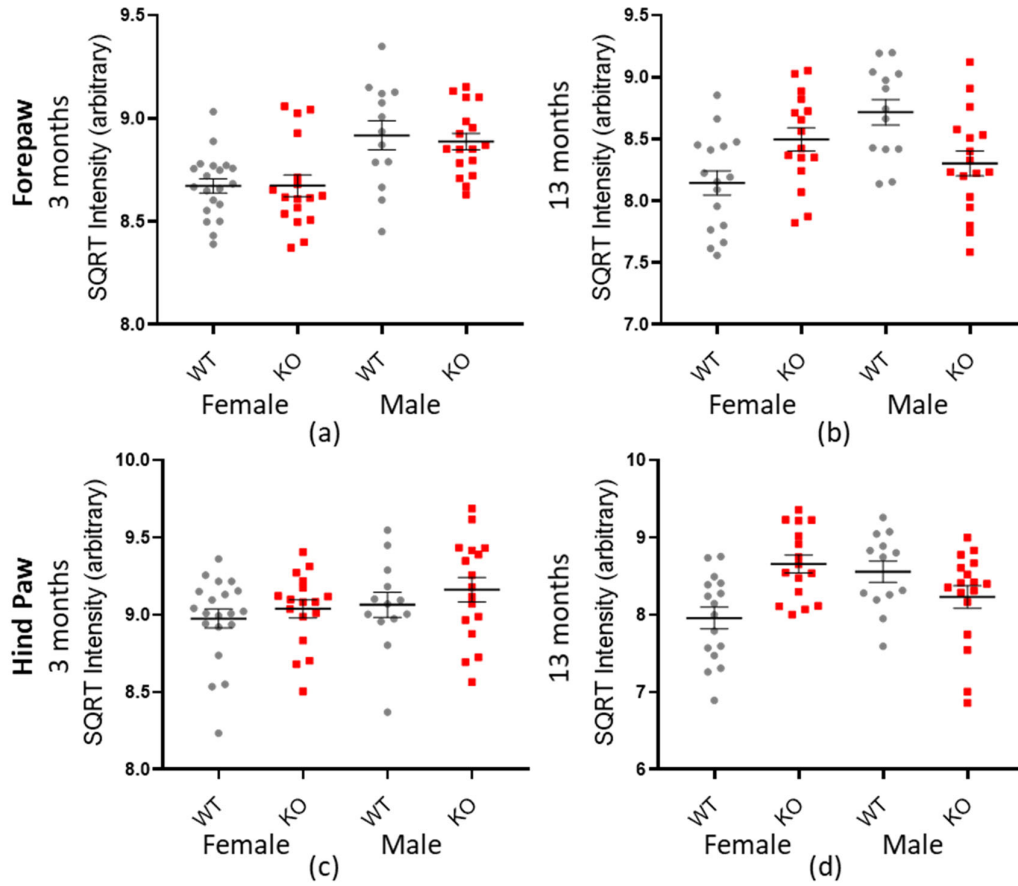

**Figure S10:** *MacroD2* KO is not associated with changes in fore or hind paw foot pressure. Results from catwalk gait analysis. Graphs show individual values dot plot, WT shown in grey circles and *MacroD2* KO in red squares. SQRT = Square root transformed. Error bars are the SEM. Graphs are as follows, **a-b**) forepaw intensity at 3 and 13 months, **c-d**) hind paw intensity at 3 and 13 months.

**Table S13:** Descriptive statistics of *MacroD1* grip strength. Results from 4 limb hang test. SQRT = square root transformed. Mean  $\pm$  SEM is presented. Individual N number is included as well as p-values for all terms and interactions. Statistics was performed on all factors combined using a factorial-ANOVA.

| <i>MacroD1</i><br>Grip Strength | SQRT Hanging Impulse (gs) |                                         |                          |
|---------------------------------|---------------------------|-----------------------------------------|--------------------------|
|                                 | AGE                       | WT                                      | <i>MacroD1</i> KO        |
| Female                          | 12 months                 | 76.94 $\pm$ 6.68<br>N=13                | 79.72 $\pm$ 4.54<br>N=17 |
| Male                            |                           | 60.14 $\pm$ 3.80<br>N=19                | 63.85 $\pm$ 5.03<br>N=15 |
| Female                          | 18 months                 | 40.27 $\pm$ 1.75<br>N=17                | 45.98 $\pm$ 4.25<br>N=15 |
| Male                            |                           | 35.13 $\pm$ 3.21<br>N=12                | 43.06 $\pm$ 3.27<br>N=12 |
| Genotype                        |                           | F <sub>(1,109)</sub> =0.51, p=0.477     |                          |
| Sex                             |                           | F <sub>(1,109)</sub> =1.05, p=0.307     |                          |
| Genotype*Sex                    |                           | F <sub>(1,109)</sub> =0.40, p=0.529     |                          |
| Cohort                          |                           | F <sub>(1,109)</sub> =19.89, *p > 0.001 |                          |
| Weight                          |                           | F <sub>(1,109)</sub> =25.43, *p > 0.001 |                          |
| Weight*Sex                      |                           | F <sub>(1,109)</sub> =1.44, p=0.234     |                          |
| Weight*Cohort                   |                           | F <sub>(1,109)</sub> =11.92, *p=0.001   |                          |
| Weight*Genotype                 |                           | F <sub>(1,109)</sub> =0.76, p=0.384     |                          |
| Sex*Cohort                      |                           | F <sub>(1,109)</sub> =1.28, p=0.261     |                          |
| Genotype*Cohort                 |                           | F <sub>(1,109)</sub> =0.19, p=0.662     |                          |

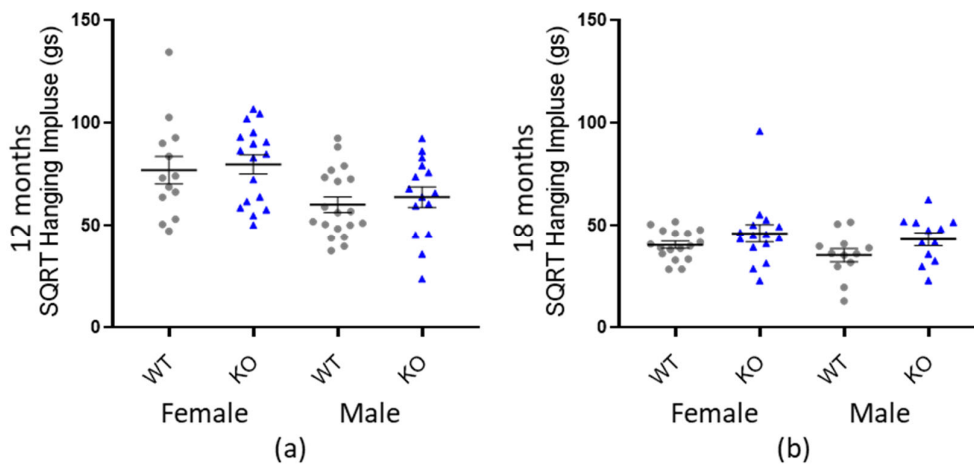

**Figure S11:** *MacroD1* KO is not associated altered grip strength. Results from 4 limb hang test. Graphs show individual values dot plot, WT shown in grey circles and *MacroD1* KO in blue triangles. SQRT = Square root transformed. Error bars are the SEM. Graphs are as follows, **a-b** SQRT hanging impulse (gs) at 12 and 18 months.

**Table 14:** Descriptive statistics of *Macro2* grip strength. Results from link lifting test. Mean  $\pm$  SEM is presented. Individual N number is included as well as p-values for all terms and interactions. *Macro2* used a factorial-ANOVA with repeated measures, hence the term Mouse name. x = not an exact F-test.

| <i>Macro2</i><br>Grip Strength | <i>Lift Score (out of 20)</i> |                                      |                            |
|--------------------------------|-------------------------------|--------------------------------------|----------------------------|
|                                | AGE                           | WT                                   | <i>Macro2</i> KO           |
| Female                         | 3 months                      | 9.606 $\pm$ 0.963<br>N=20            | 11.149 $\pm$ 0.927<br>N=17 |
| Male                           |                               | 7.995 $\pm$ 0.818<br>N=13            | 8.082 $\pm$ 0.578<br>N=16  |
| Female                         | 13 months                     | 5.407 $\pm$ 0.820<br>N=16            | 6.45 $\pm$ 1.01<br>N=16    |
| Male                           |                               | 5.464 $\pm$ 0.404<br>N=13            | 4.900 $\pm$ 0.289<br>N=17  |
| Genotype                       |                               | F <sub>(1,53)</sub> =0.03, p=0.866 x |                            |
| Sex                            |                               | F <sub>(1,53)</sub> =0.13, p=0.721 x |                            |
| Genotype*Sex                   |                               | F <sub>(1,53)</sub> =1.69, p=0.198 x |                            |
| Cohort                         |                               | F <sub>(1,53)</sub> =3.26, p=0.077   |                            |
| Weight                         |                               | F <sub>(1,53)</sub> =1.83, p=0.182   |                            |
| Weight*Sex                     |                               | F <sub>(1,53)</sub> =0.04, p=0.846   |                            |
| Weight*Cohort                  |                               | F <sub>(1,53)</sub> =1.94, p=0.170   |                            |
| Sex*Cohort                     |                               | F <sub>(1,53)</sub> =0.19, p=0.667   |                            |
| Genotype*Cohort                |                               | F <sub>(1,53)</sub> =0.50, p=0.483   |                            |
| Mouse name                     |                               | F <sub>(1,53)</sub> =1.55, p=0.052   |                            |

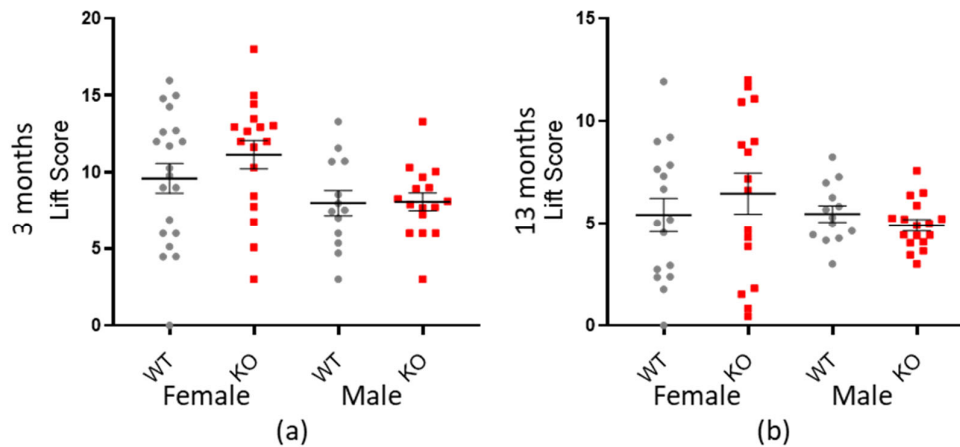

**Figure S12:** *Macro2* KO is not associated altered grip strength. Results from link lifting test. Graphs show individual values dot plot, WT shown in grey circles and *Macro2* KO in red squares. Error bars are the SEM. Graphs are as follows, **a-b)** Lift score at 3 and 13 months.
